# Supplementary material
Source: Elsevier journal article supplement (https://www.sciencedirect.com/science/article/pii/S0021755721001352)
Supplement: mmc1 [file S0021755721001352:mmc1.docx]

JPED-D-21-00192 – Supplementary Material

**Supplementary Table 1 - Diagnostic performance after removing the two-weight types of research.**

| **Diagnostic performance** | **Pooled value** | **Removed Elmas[17] and Zhang BB a[24]** |
| --- | --- | --- |
| SEN | 0.84 (95%CI:0.74-0.91) | 0.84 (95%CI:0.76-0.90) |
| SPE | 0.81 (95%CI:0.75-0.86) | 0.82 (95%CI:0.75-0.87) |
| PLR | 4.39 (95%CI:3.23-5.97) | 4.6 (95%CI:3.2-6.7) |
| NLR | 0.19 (95%CI:0.11-0.34) | 0.19 (95%CI:0.12-0.30) |
| DOR | 22.58 (95%CI:10.44-48.83) | 24 (95%CI:11-51) |
| AUC | 0.88 (95%CI:0.85-0.90) | 0.90 (95%CI:0.87-0.92) |

SEN, sensitivity; SPE, specificity; PLR, positive likelihood ratio; NLR, negative likelihood ratio; DOR, diagnostic odds ratio; AUC, area under the curve.
